# Supplementary material for: Machine Learning Algorithms, Applied to Intact Islets of Langerhans, Demonstrate Significantly Enhanced Insulin Staining at the Capillary Interface of Human Pancreatic β Cells
Source: MDPI journal article supplement (doi:10.3390/metabo11060363), 2021-06-07
Supplement: s1 [file s1]

## Supplementary Material

**Supplementary Table S1:** Definitions of the descriptors used to explain the performance of deep learning models

| Descriptor | Definition                                                                                                                                         |
|------------|----------------------------------------------------------------------------------------------------------------------------------------------------|
| Accuracy   | Ability to predict true positives and true negatives in the data                                                                                   |
| Loss       | Loss is a measurement of the gap between what values have been predicted by the model and what is the true value as provided by the training data. |
| Precision  | Indication of models' ability to predict the location of true positives as a proportion of true positives and false positives                      |
| Recall     | Indication of the models' ability to predict the location of true positives as a proportion of true positives and false negatives                  |
| F1         | An overall metric combining precision and recall                                                                                                   |
| Epoch      | Average number of learning iterations undergone by the before no further improvement was achieved                                                  |

### S1- Image Processing Macros: Image format conversion

```
macro "Create Slice Images" {  
  
    // Display welcome dialogue box  
    Dialog.create("Convert a Project Series into individual slice images");  
  
    Dialog.addMessage("This macro allows you to:\n 1) Import a .lif file\n 2) Create individual images for each slice");  
  
    Dialog.addRadioButtonGroup("Continue?", newArray("Yes", "No"), 1,2,"Yes");  
  
    Dialog.show();  
  
    Continue = Dialog.getRadioButton();  
  
    if(Continue == "No") {  
        exit();  
    }  
  
    // Select and open the .lif imagefile  
    open();  
  
    //Adjust the channel colours  
  
    run("Channels Tool...");
```

```
Stack.setDisplayMode("color");

Stack.setChannel(1);

run("Magenta");

Stack.setChannel(2);

run("Blue");

Stack.setChannel(3);

run("Green");

Stack.setChannel(4);

run("Cyan");

Stack.setChannel(5);

run("Grays");


// Create a composite image and select only channels 1,3,5

Stack.setDisplayMode("composite");

Stack.setActiveChannels("10110");


// Change type to RGB

run("RGB Color", "slices keep");


// Display close dialogue box

Dialog.create("All Done");

Dialog.addMessage("Image is ready to be saved using:\n  File>Save As>Image  
Sequence...\n Format=PNG; Digits=3;\n Name: replace from .lif with -SeriesNN-")

Dialog.show();
```

## **S2- Image Processing Macros: Processing Cell masks**

```
macro "Save the masks and ROIs for cell boundary segmentation [L]" {  
  
/  
  
// Set variables  
  
    title = getTitle()  
  
// Clear selections from the image: "Image>Overlay>Remove Overlay"  
  
    run("Remove Overlay");  
  
// Create a black and white mask image of the selected cell  
  
    run("Create Mask");  
  
// Saves the mask to a .png file: "File>Save as>PNG..."  
  
    saveAs("PNG");  
    close();  
  
// Saves the selection in the ROI Manager: "Image>Overlay>Add Selection">  
  
    selectWindow(title);  
    run("Add Selection...");  
  
// Load the previous selections: "Image>Overlay>From ROI Manager"  
  
    run("From ROI Manager");  
  
// Save all the selections: "Image>Overlay>From ROI Manager"  
  
    run("To ROI Manager");  
  
//  
    close();  
    exit();  
}
```
